# Supplementary material for: DUX4 Binding to Retroelements Creates Promoters That Are Active in FSHD Muscle and Testis
Source: PubMed Central journal article supplement (PMC3836709; doi:10.1371/journal.pgen.1003947), 2013-11-21

# Supplementary Figure 7

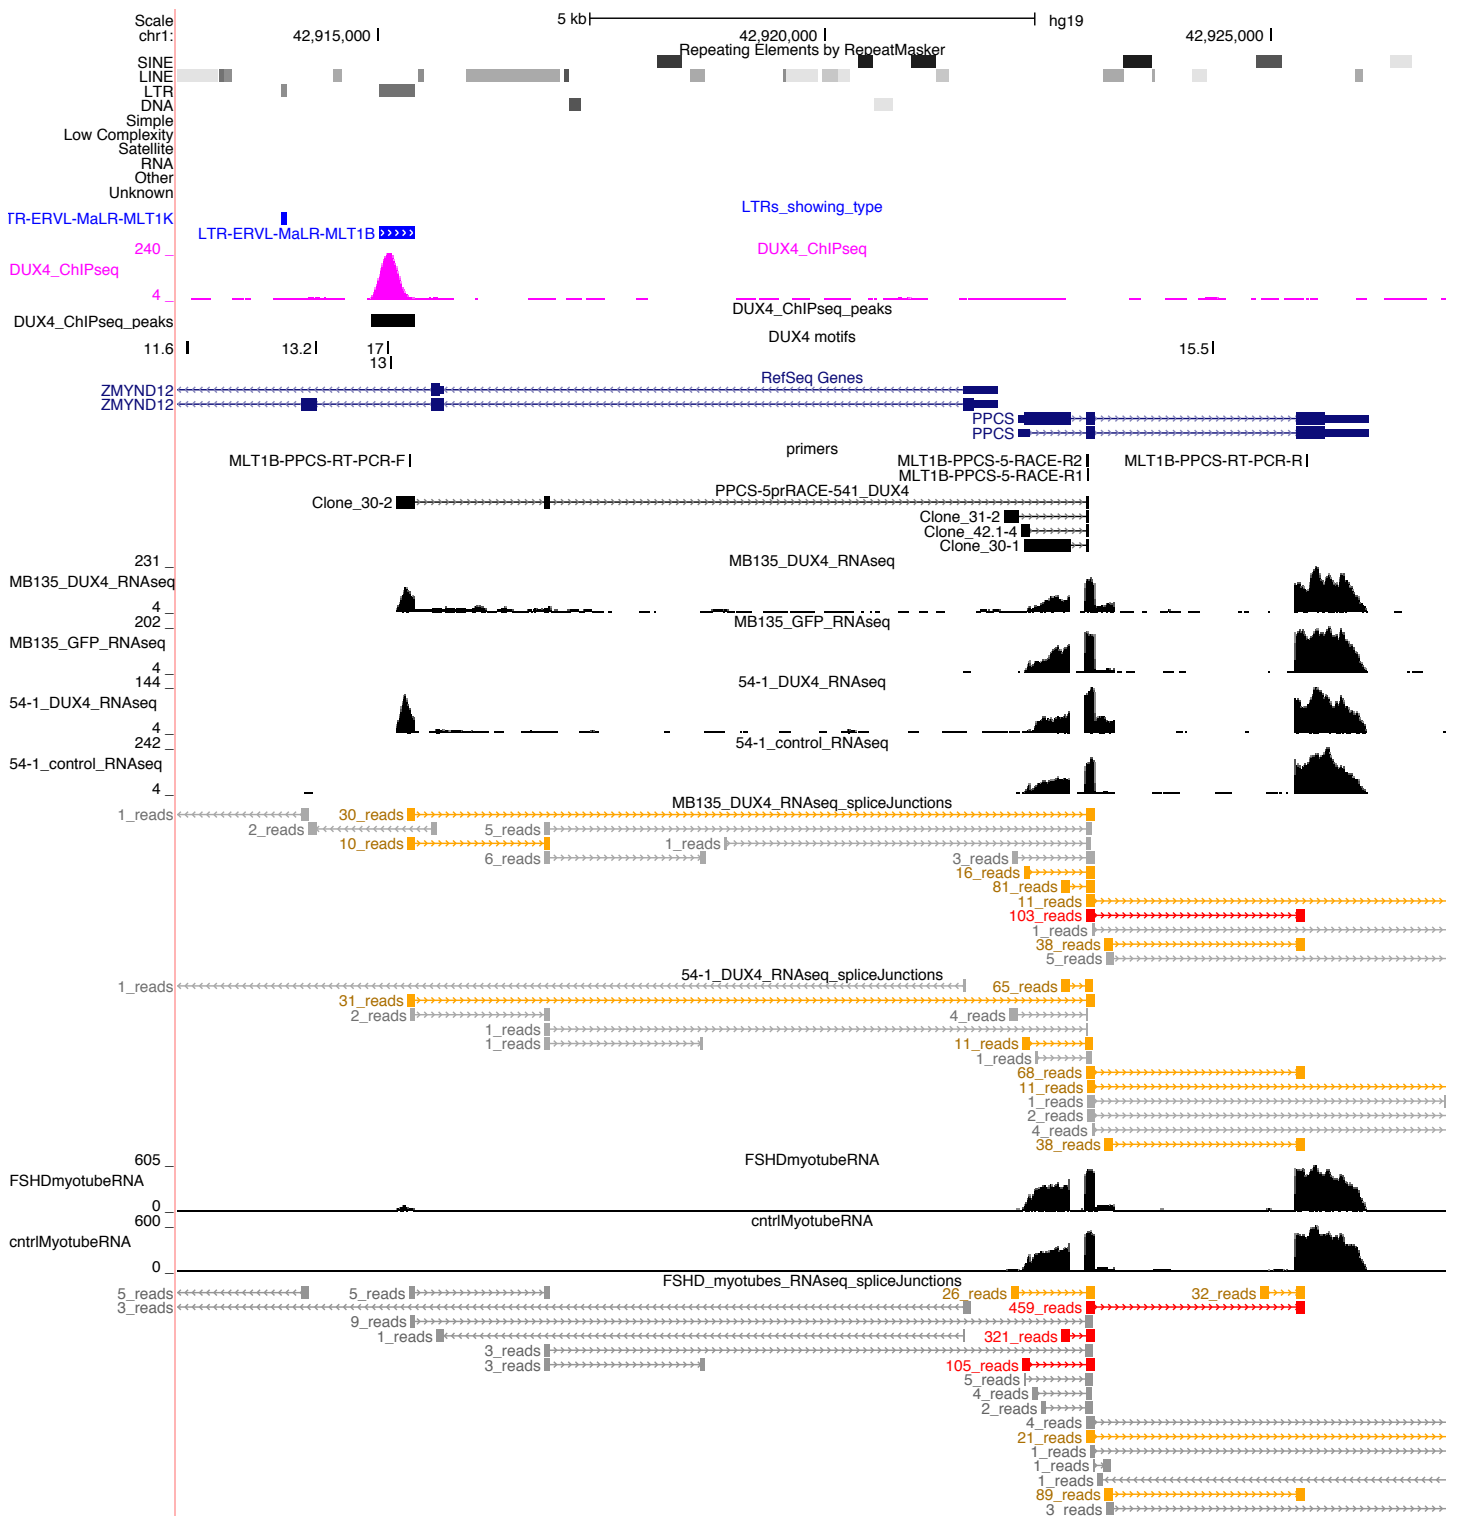

Supplement: pgen.1003947.s008.pdf [file pgen.1003947.s008.pdf]
